# Supplementary material
Source: PubMed Central journal article supplement (PMC3785567)
Supplement: NIHMS511366-supplement-1.pdf [file NIHMS511366-supplement-1.pdf]

**SUPPLEMENTARY INFORMATION FOR:**

**DNA methylation regulates associative reward learning**

Jeremy J. Day, Daniel Childs, Mikael C. Guzman-Karlsson, Mercy Kibe, Jerome Moulden,  
Esther Song, Absar Tahir, J. David Sweatt\*

*Department of Neurobiology and Evelyn F. McKnight Brain Institute, University of Alabama at  
Birmingham, Birmingham, AL*

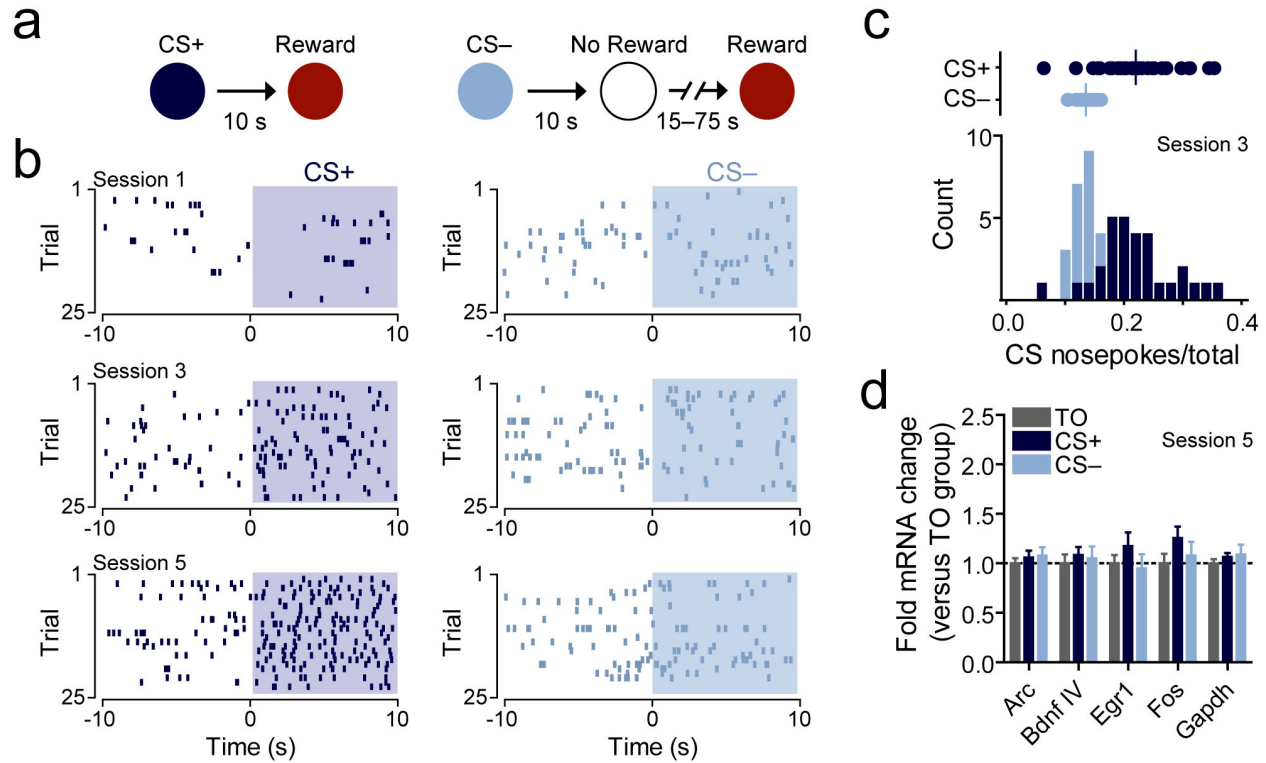

**Supplementary Figure 1.** Behavioral training and IEG expression after task acquisition. **a-b**, Representative examples of learned increases in anticipatory nosepoke responses during the reward predictive CS+, as compared to an animal trained in the CS- task in which rewards and audio cues were delivered in an unpaired fashion. Data are shown as peri-event raster plots, with trials stacked on the y axis and time relative to cue presentation on the x axis. Each tick mark represents an individual nosepoke response. **c**, Variability in learned cue-evoked nosepekes in behavioral session 3. Top panel, distribution of individual animals in terms of cue-specific approach responding (total nosepekes during cue period divided by total nosepekes in the entire behavioral session). Bottom panel, frequency distribution of cue-related nosepekes. Although some animals exhibited significant anticipatory nosepoke responding during the CS+ presentation, anticipatory responding in other CS+ animals overlapped with CS- animals, indicating poor memory formation. Only animals that contributed mRNA data in VTA experiments were included. **d**, After task acquisition, experience with reward-paired cues does not alter IEG expression in the VTA. Experience with a reward-predictive CS+ did not change expression of any gene ( $n = 9-11$  per group; one-way ANOVA: main effect of training,  $p > 0.3$  for all comparisons). Animals were sacrificed 1hr after the 5<sup>th</sup> conditioning session.

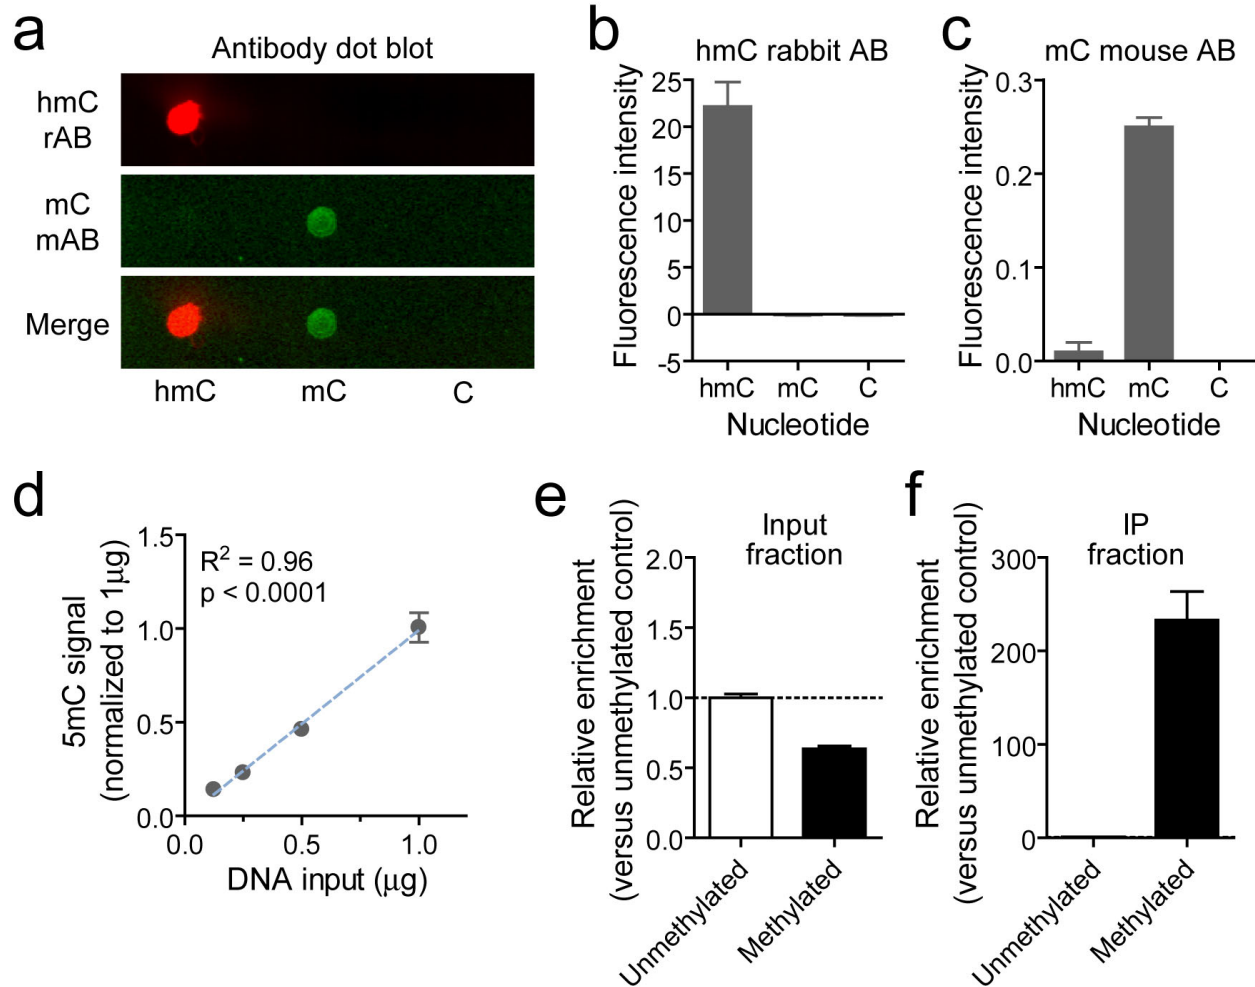

**Supplementary Figure 2.** Validation of methylated DNA immunoprecipitation to detect changes in DNA methylation. **a**, Antibody dot blots confirmed specific binding of hydroxymethylcytosine antibodies to hmC and methylcytosine antibodies to mC, with little non-specific binding and unmodified cytosines (C). **b-c**, Quantification of antibody dot blots. **b**, hmC-specific antibody generated significantly more hmC binding signal, as compared to mC and unmodified cytosine signal ( $n = 2$  per group; one-way ANOVA: main effect base modification on fluorescence intensity,  $F_{(2,5)} = 74.05$ ,  $P < 0.0028$ ). **c**, mC-specific antibody generated significantly more mC binding signal, as compared to hmC and unmodified cytosine signal ( $n = 2$  per group; one-way ANOVA: main effect base modification on fluorescence intensity,  $F_{(2,5)} = 300.5$ ,  $P < 0.0004$ ). **d**, Methylated DNA enrichment, as determined by qPCR at the *Fos* promoter locus (Figure 1i), exhibited significant dependence on input DNA concentration in response to a serial dilution. **e-f**, Methylated DNA enrichment, as determined by qPCR for a synthetic DNA duplex consisting of either completely unmethylated or completely methylated cytosine bases. Although less methylated DNA was detected in the input fraction (**e**), ~200 fold more methylated DNA was detected in the IP fraction following immunoprecipitation with an mC antibody. Error bars represent s.e.m.

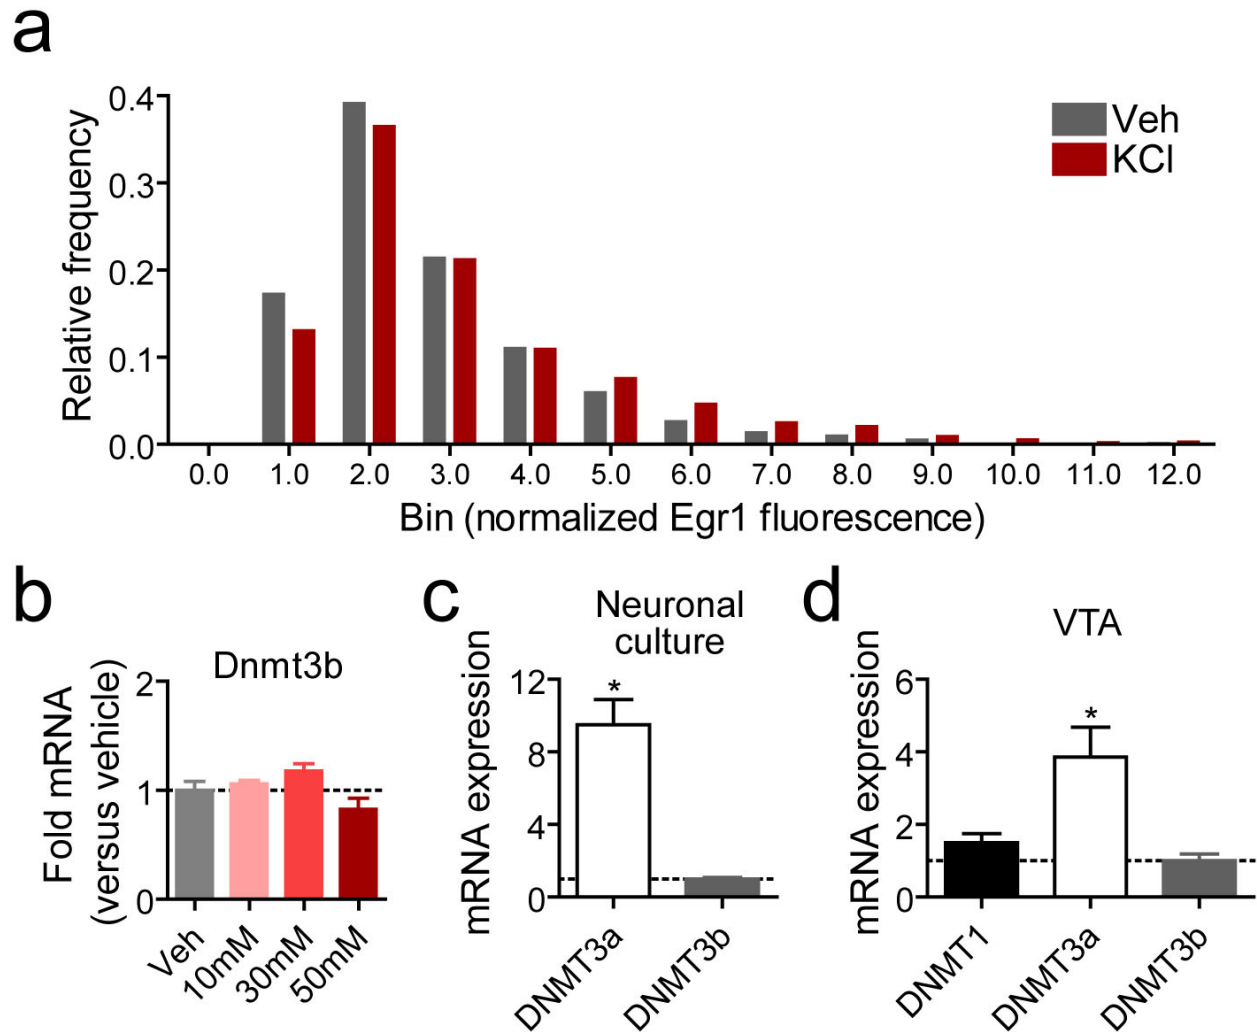

**Supplementary Figure 3.** Activity-induced changes in EGR1 protein and comparisons between *Dnmt* isoforms in neuronal culture and in the brain. **a**, Relative frequency distribution of cellular EGR1 levels following vehicle and KCl treatment. KCl specifically increased the proportion of cells with high EGR1 protein levels. **b**, 1hr KCl stimulation did not alter *Dnmt3b* levels ( $n=3$  per group; one-way ANOVA: main effect of treatment,  $F_{(3,11)} = 3.91$ ,  $P = 0.0544$ ). **c**, Differential expression of *Dnmt* mRNA in neuronal cultures at 10 days in vitro. *Dnmt3a* expression was significantly higher than *Dnmt3b* expression ( $n = 3$  per group; Student's  $t$ -test  $t_4 = 6.112$ ,  $*P = 0.0036$ ). **d**, Differential expression of *Dnmt* isoforms in adult rat VTA tissue. Again, *Dnmt3a* expression was significantly elevated as compared to *Dnmt3b* and *Dnmt1* ( $n = 5$  per group; one-way ANOVA: main effect of isoform,  $F_{(2,14)} = 8.97$ ,  $P = 0.0041$ ; Tukey post-hoc tests revealed significantly higher mRNA for *Dnmt3a* vs *Dnmt3b* and *Dnmt1*,  $*P < 0.05$ ).

## Supplementary Table 1

### mRNA RT-qPCR primers

| <u>Gene</u>         | <u>Forward sequence</u>   | <u>Reverse sequence</u>   |
|---------------------|---------------------------|---------------------------|
| <i>Arc</i>          | GCTGAAGCAGCAGACCTGA       | TTCACCTGGTATGAAATCACTGCTG |
| <i>BDNF exon IV</i> | CTGCCTAGATCAAAATGGAGCTTCT | GGAAATTCATGGCCGGAGGTAA    |
| <i>Dnmt1</i>        | GTGTGCGGGAATGTGCTCGCT     | CAGTGGTGGTGGCACAGCGT      |
| <i>Dnmt3a</i>       | AGCAAAGTGAGGACCAATACCACCA | TGTGTAGTGGACAGGGAGGCCA    |
| <i>Dnmt3b</i>       | TGGCAAGGATGACGTTCTGTGGT   | CTGGCACACTCCAGGACCTTCC    |
| <i>Egr1</i>         | TCCTCAAGGGGAGCCGAGCG      | GGTGATGGGAGGCAACCCGGG     |
| <i>Fos</i>          | CAGCCTTTCCTACTACCAATCC    | ACAGATCTGGCAAAAAGTCC      |
| <i>FosB</i>         | TGCAGCTAAAATGCAGAAACC     | CTCTTCGAGCTGAATCCGTTT     |
| <i>ΔFosB</i>        | AGGCAGAGCTGGAGTCGGAGAT    | GCCGAGGACTTGAACCTTCACTCG  |
| <i>Gapdh</i>        | ACCTTTGATGCTGGGGCTGGC     | GGGCTGAGTTGGGATGGGGACT    |

### Genomic DNA PCR primers (MeDIP and ChIP experiments)

| <u>Gene</u>  | <u>Forward sequence</u> | <u>Reverse sequence</u> | <u>Gene location/nomenclature</u> |
|--------------|-------------------------|-------------------------|-----------------------------------|
| <i>Egr1</i>  | CAC TGGG TCTAAGGCTCTCC  | AGGTCCTGGGTTGTATTCCG    | Promoter (E1)                     |
| <i>Egr1</i>  | CGGTGACACCTGGAAAGTGA    | GAGTCAGCCGGGGTTCTA      | Promoter (E2)                     |
| <i>Egr1</i>  | CCTTTCCTCACTCACCCACC    | CGGCTCCCCTTGAGGATTG     | Promoter/TSS spanning (E3)        |
| <i>Egr1</i>  | CAACTCATCAAAACCCAGCCG   | GATTCGACACTGGAAAGGGCT   | Intragenic (E4)                   |
| <i>Fos</i>   | GGTGCGAATGTTGCTCGCCT    | GGACCGGCCGTGGAAACCTG    | Promoter (F1)                     |
| <i>Fos</i>   | GAGCAGTCAGAGAAGGCAGG    | TAGGTCTACGGGAACCCCTC    | Intragenic (F2)                   |
| <i>Gapdh</i> | GGTCGGAGCCCAACCGTTG     | TCCCGTCTGGGCTCATCCAGT   | Promoter (G1)                     |
